# Supplementary material for: Effect of diets with goat milk fat supplemented with exercise on anxiety and oxidative stress in the brains of adult rats
Source: Royal Society of Chemistry journal article supplement (doi:10.1039/c7fo01764b), 2018-01-01
Supplement: c7fo01764b1.pdf [file c7fo01764b1.pdf]

### Additional Information

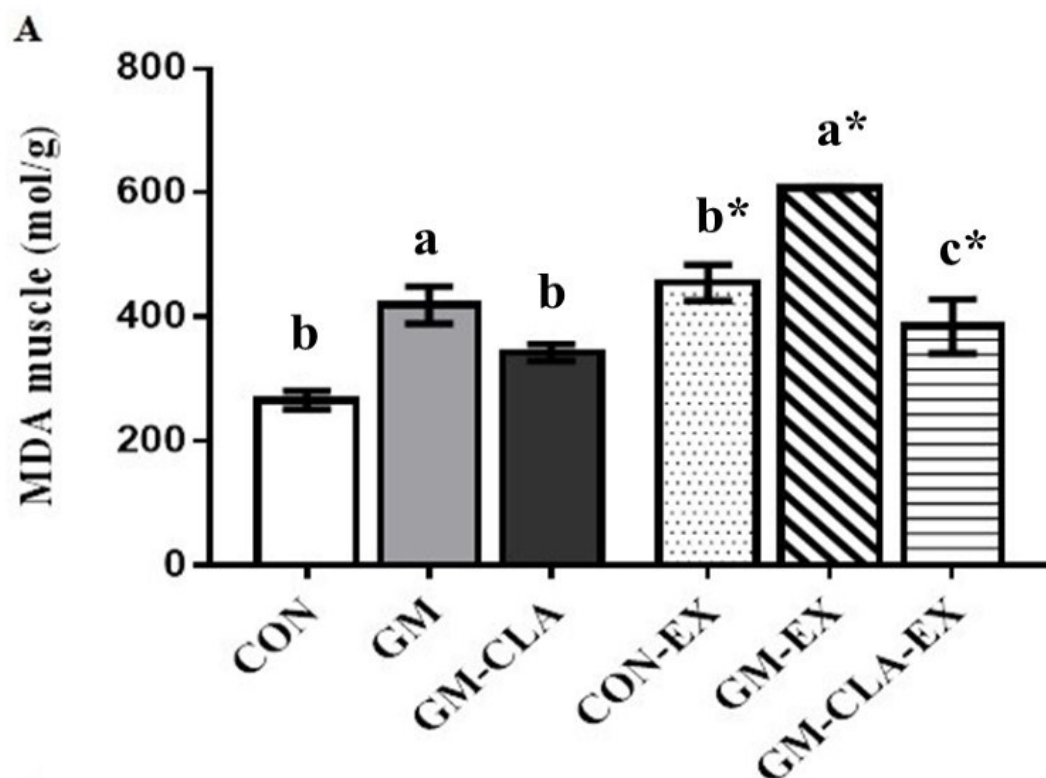

**Figure S1:** MDA levels in the muscle of rats treated with goat milk lipids. Data expressed as Mean  $\pm$  DP, n = 10/group. Different letters between bars signify significant differences between groups ( $p < 0.05$ ). \*Significant differences between groups sedentary and exercised. Two-way ANOVA analysis followed by Tukey test. Control sedentary (CON) and exercised group (CON-EX); Goat milk lipids sedentary (GM) and exercised group (GM-EX); sedentary CLA (GM-CLA) and exercised group (GM-CLA-EX).
